# Supplementary material for: Cost-effective approach for structural evolution of Si-based multicomponent for Li-ion battery anodes
Source: Royal Society of Chemistry journal article supplement (doi:10.1039/c6ta08889a), 2016-12-19
Supplement: c6ta08889a1.pdf [file c6ta08889a1.pdf]

## Electronic Supplementary Information

### Cost-effective approach for structural evolution of Si-based multicomponent for Li-ion battery anodes

Dongki Hong<sup>‡a</sup>, Jaegeon Ryu<sup>‡a</sup>, Sunghee Shin<sup>a</sup> and Soojin Park<sup>\*a</sup>

<sup>a</sup>Department of Energy Engineering, School of Energy and Chemical Engineering, Ulsan National Institute of Science and Technology (UNIST), Ulsan 44919, South Korea

\*Corresponding Authors:

Soojin Park, spark@unist.ac.kr

‡ These authors contributed equally to this work.

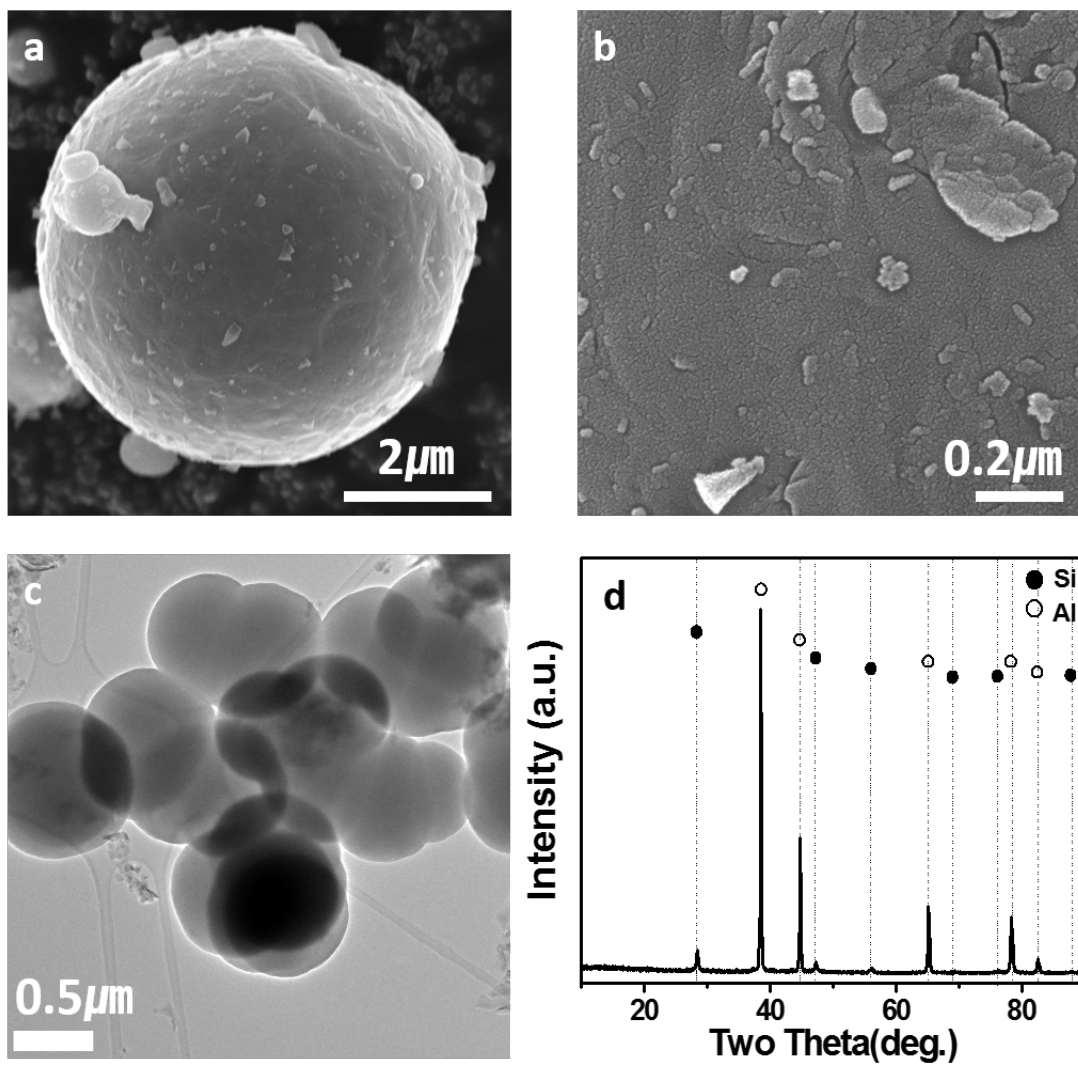

**Figure S1. Characterization of pristine Al-Si alloy.** (a-b) SEM images, (c) TEM image and (d) XRD pattern of pristine Al-Si alloy

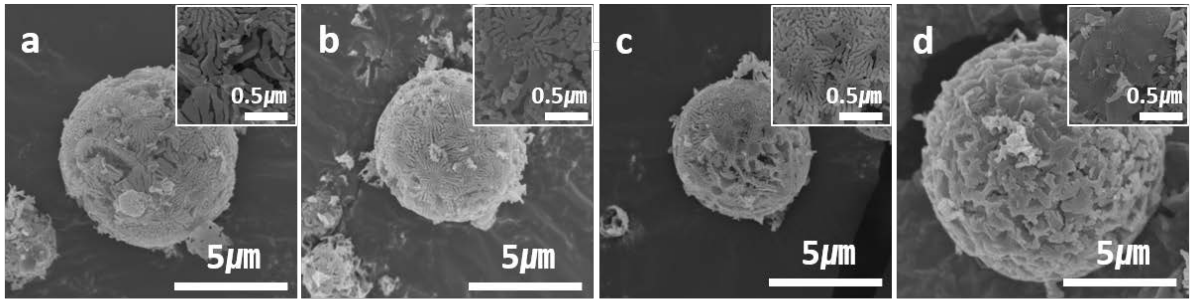

**e**

| (wt%)     | Pristine | Al-Si-4 | Al-Si-10 | Al-Si-20 | Al-Si-40 |
|-----------|----------|---------|----------|----------|----------|
| <b>O</b>  | 4.45     | 7.56    | 7.27     | 7.45     | 8.04     |
| <b>Al</b> | 84.69    | 4.28    | 10.38    | 21.10    | 39.65    |
| <b>Si</b> | 10.87    | 88.16   | 82.34    | 71.45    | 52.30    |

**Figure S2. Structural analysis of etched Al-Si.** SEM images of etched Al-Si (a) 04, (b) 10, (c) 20 and (d) 40 samples. (e) EDX quantification results of each samples.

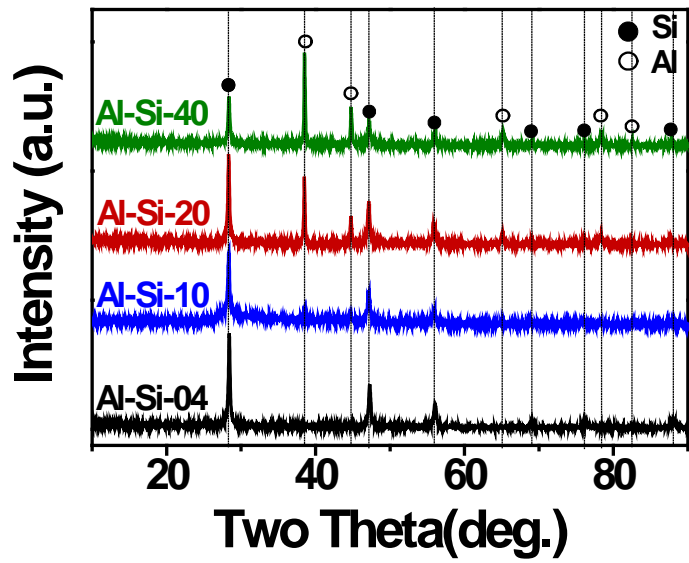

Figure S3. Crystal structure analysis of etched Al-Si. XRD pattern of Etched Al-Si.

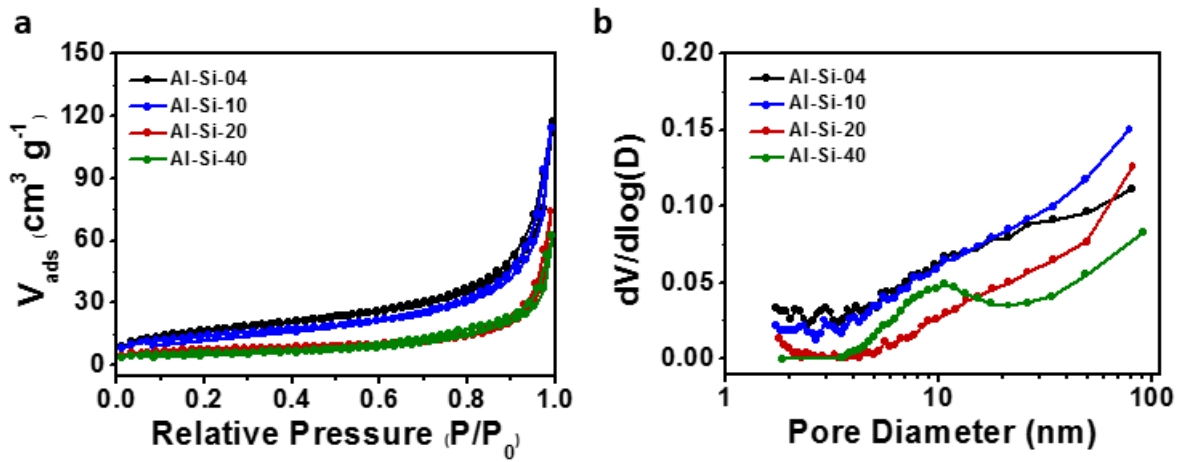

Figure S4. Porosity characterization of etched Al-Si. (a) Nitrogen adsorption isotherm and (b) BJH pore size distribution of etched Al-Si.

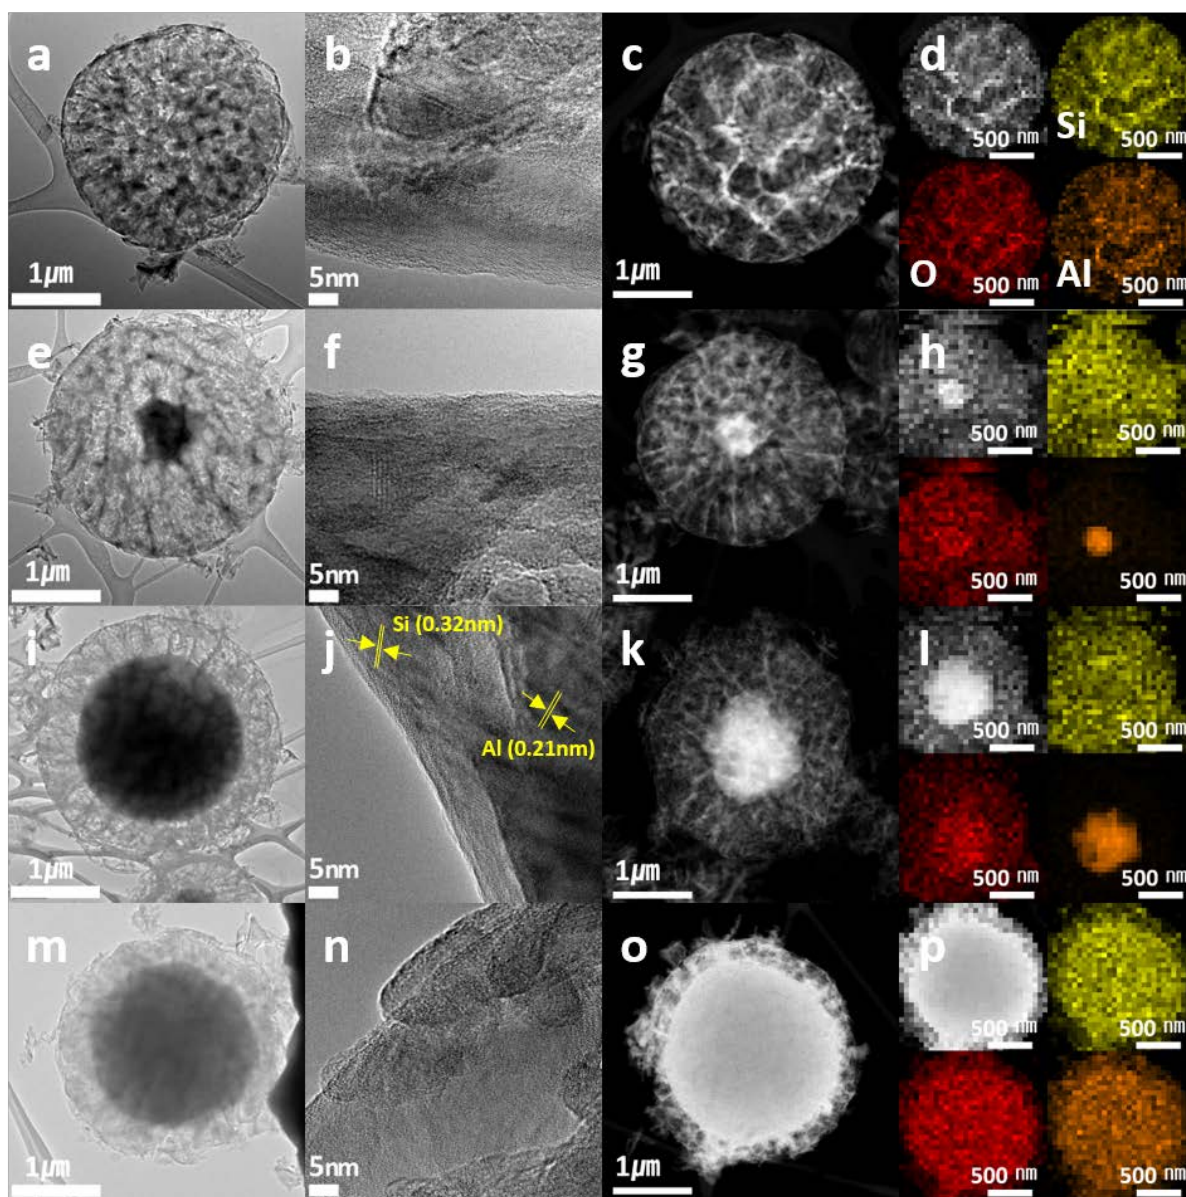

**Figure S5. TEM characterization of etched Al-Si.** TEM images, STEM-HAADF and EDX mapping results of etched Al-Si (a-d) 04, (e-h) 10, (i-l) 20 and (m-p) 40 samples.

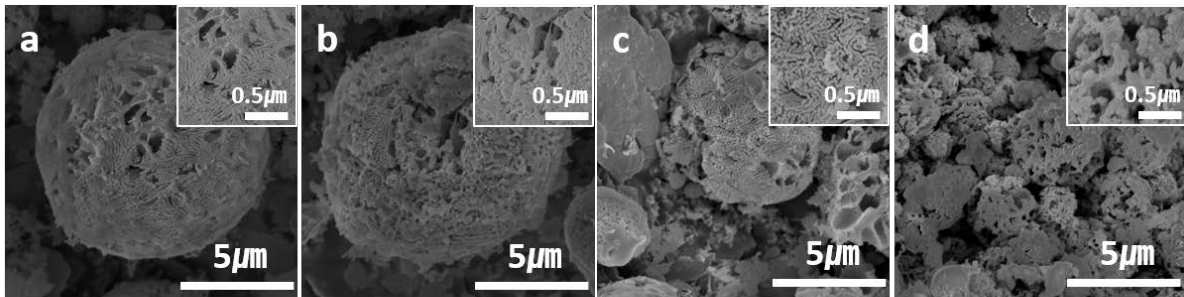

**e**

| (wt%)     | ASWO-4 | ASWO-10 | ASWO-20 | ASWO-40 |
|-----------|--------|---------|---------|---------|
| <b>O</b>  | 11.85  | 13.57   | 16.24   | 20.63   |
| <b>Al</b> | 2.82   | 8.71    | 14.69   | 30.37   |
| <b>Si</b> | 85.32  | 77.73   | 69.07   | 49.00   |

**f**

|              | Al-4wt%        |          | Al-10wt% |          | Al-20wt% |          | Al-40wt% |          |
|--------------|----------------|----------|----------|----------|----------|----------|----------|----------|
|              | Etched         | Oxidized | Etched   | Oxidized | Etched   | Oxidized | Etched   | Oxidized |
| <b>Si/Al</b> | 20.60          | 30.26    | 7.93     | 8.92     | 3.39     | 4.70     | 1.32     | 1.61     |
|              | 46.9% increase |          | 12.5%    |          | 38.6%    |          | 22.0%    |          |

**Figure S6. Structural analysis of wet-oxidized etched Al-Si (ASWO).** SEM images of ASWO (a) 04, (b) 10, (c) 20 and (d) 40 sample. (e-f) EDX quantification results.

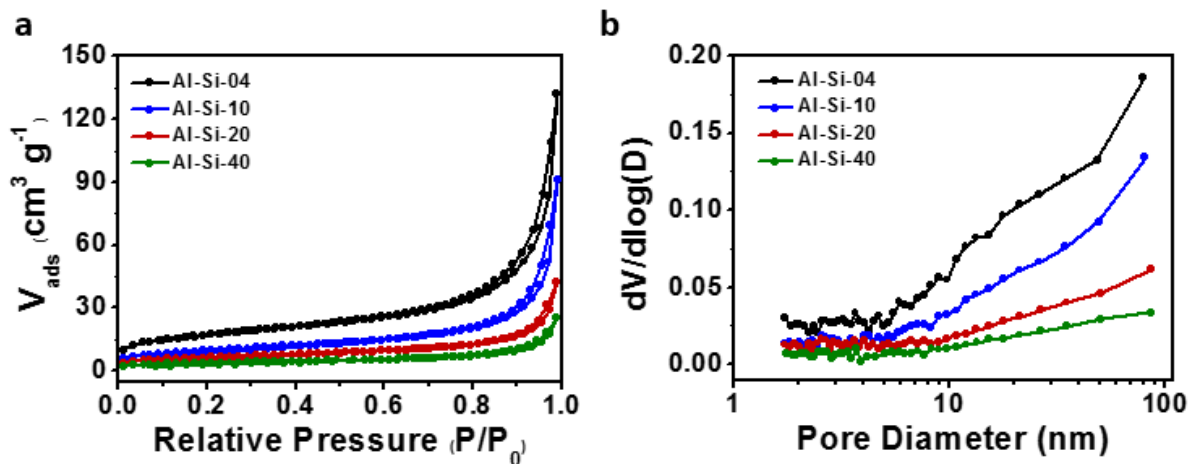

**Figure S7. Porosity characterization of ASWO.** (a) Nitrogen adsorption isotherm and (b) BJH pore size distribution of ASWO samples.

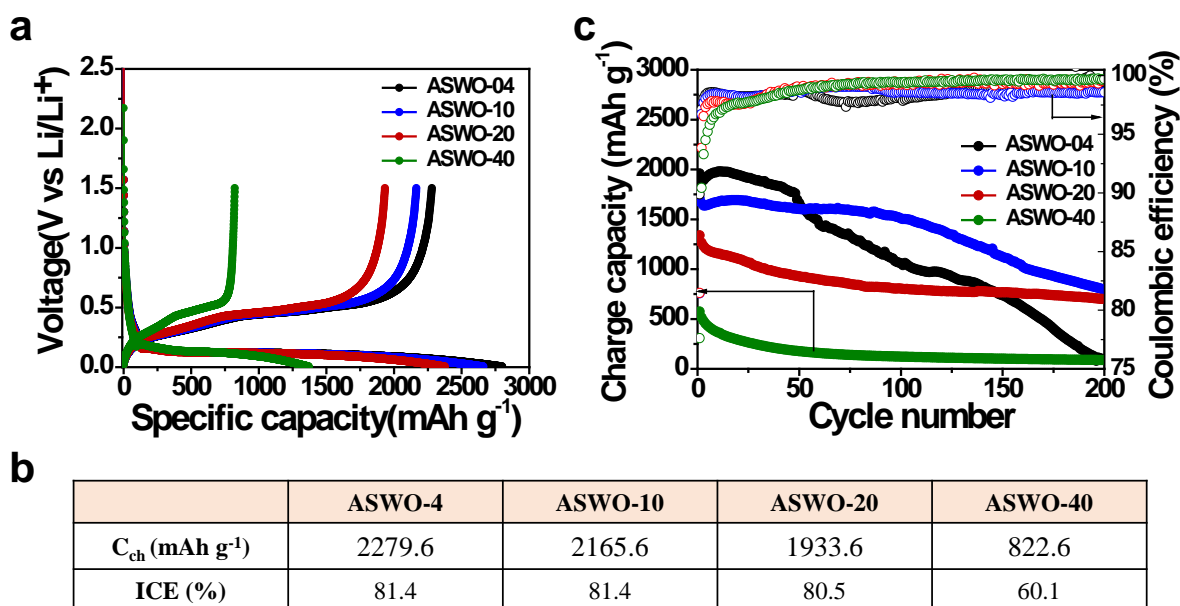

**Figure S8. Electrochemical properties of etched Al-Si in half cell.** (a) Initial charge-discharge profiles at C/20, (b) Summary chart for capacity and ICE, and (c) Cyclic performances for 200 cycles at C/5.

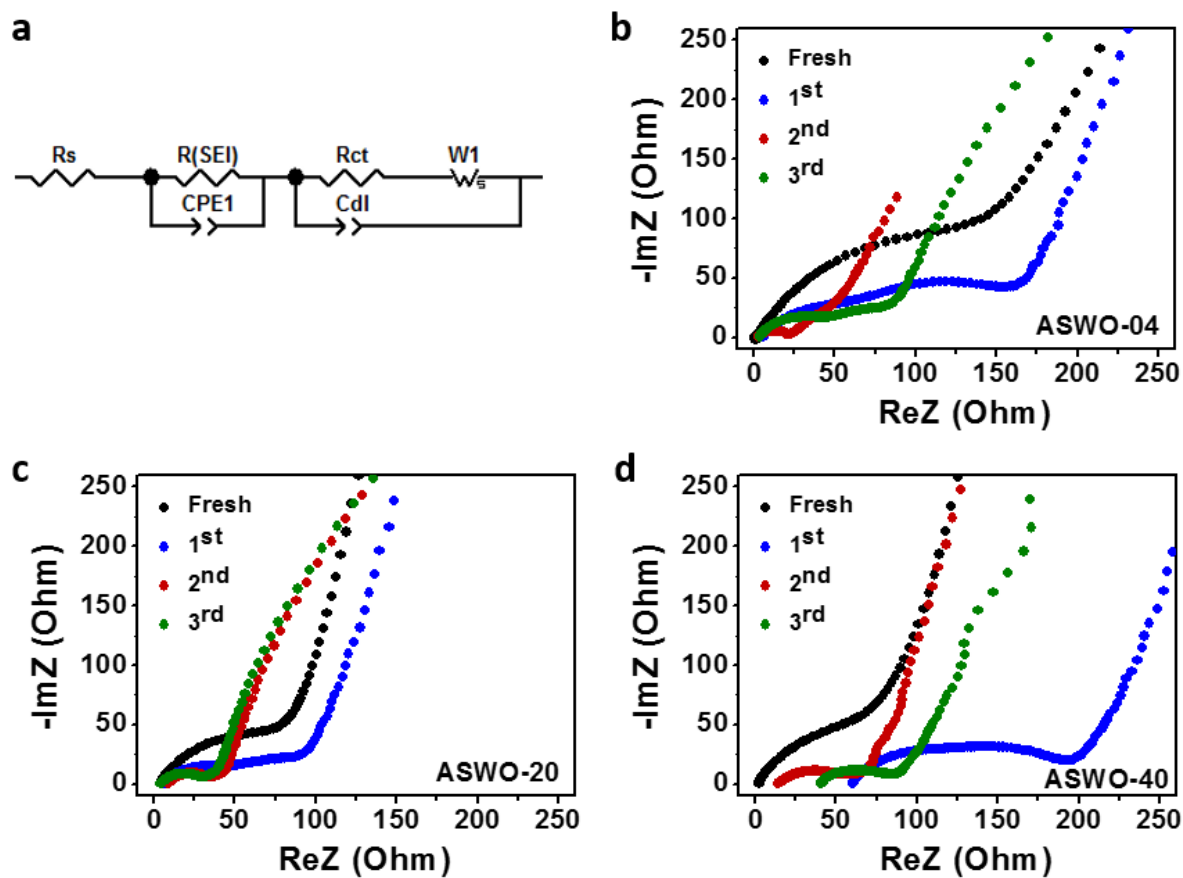

**Figure S9. Electrochemical Impedance spectroscopy (EIS) analysis of ASWO electrodes.**

(a) Equivalent Short circuit model of electrochemical impedance spectroscopy measurement.

Ex-situ impedance analysis of (b) ASWO-04, (c) ASWO-20 and (d) ASWO-40 electrodes.



|                                                                            | 4wt%        | 10wt%       | 20wt%       | 40wt%       |
|----------------------------------------------------------------------------|-------------|-------------|-------------|-------------|
| Pristine ( $\mu\text{m}$ )                                                 | 10.5        | 17.5        | 19.5        | 10.1        |
| Lithiation ( $\mu\text{m}$ )                                               | 19.5        | 20.2        | 26.8        | 19.1        |
| After 30cycle ( $\mu\text{m}$ )                                            | 16.1        | 20.7        | 27.1        | 18.7        |
| <b>Volume change (%)<br/>Pristine <math>\rightarrow</math> Litiation</b>   | <b>85.7</b> | <b>15.4</b> | <b>37.4</b> | <b>89.1</b> |
| <b>Volume change (%)<br/>Pristine <math>\rightarrow</math> After cycle</b> | <b>53.3</b> | <b>18.2</b> | <b>39.0</b> | <b>85.1</b> |

**Figure S10.** Summary chart for electrode swelling results.

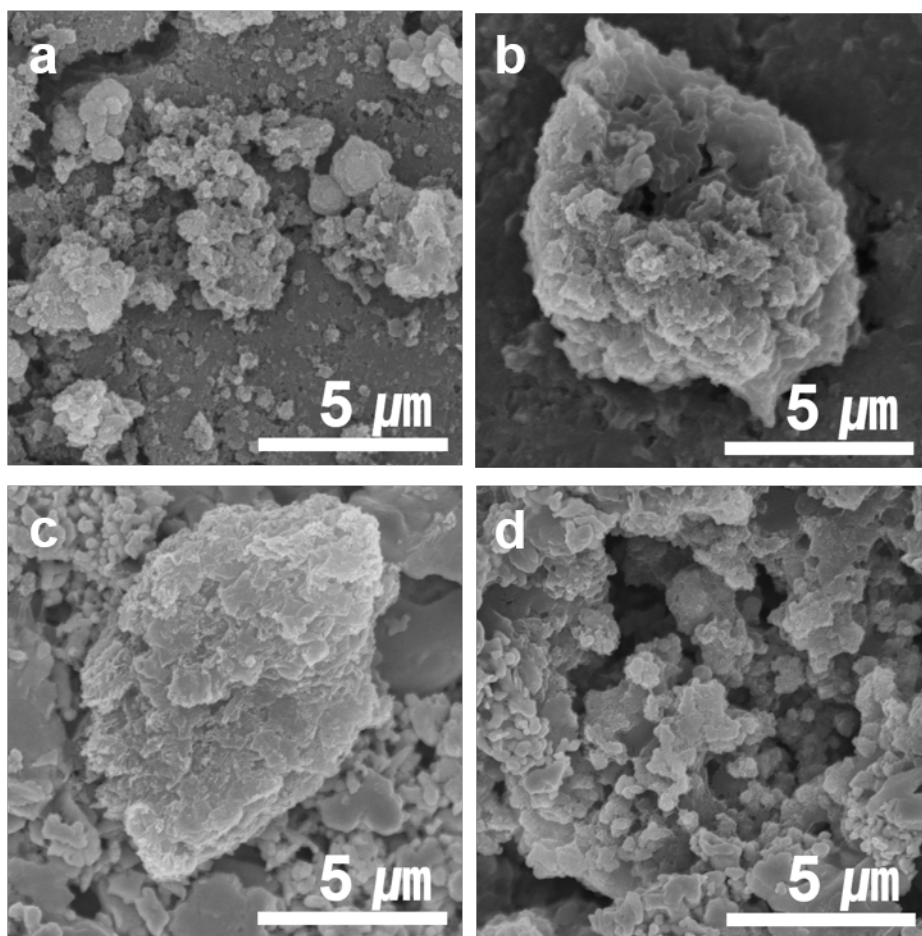

**Figure S11.** Morphological changes of ASWO samples after 30 cycles at a rate of 0.2 C. SEM images of (a) ASWO-04, (b) ASWO-10, (c) ASWO-20 and (d) ASWO-40 samples.

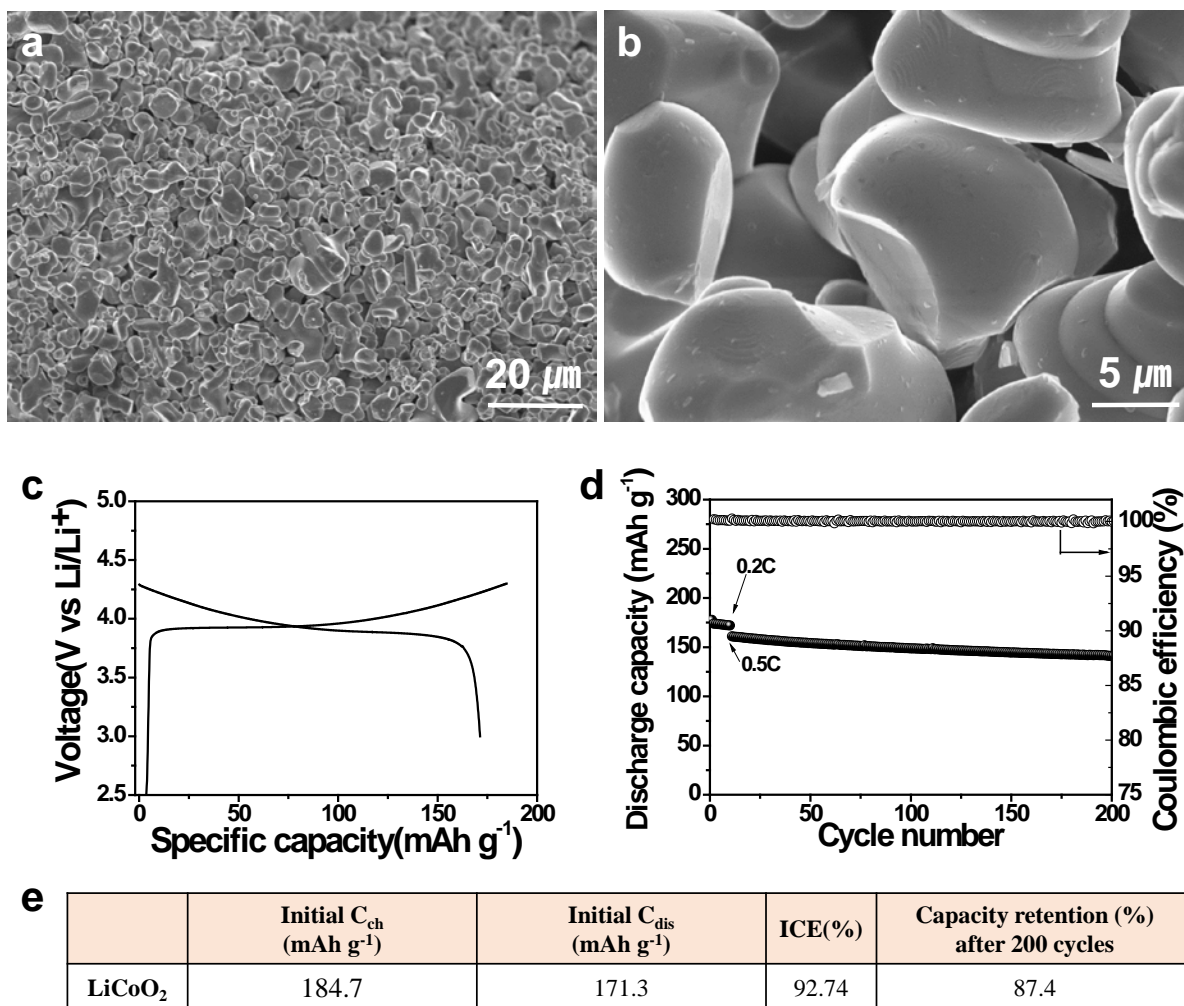

**Figure S12.** Properties of  $\text{LiCoO}_2$  (LCO) cathode in half cell. (a-b) SEM images, (c) initial charge-discharge profiles at a rate of 0.1 C, (d) cyclic performance for 200 cycles at a rate of 0.5 C and (e) summarized electrochemical properties of LCO cathode.

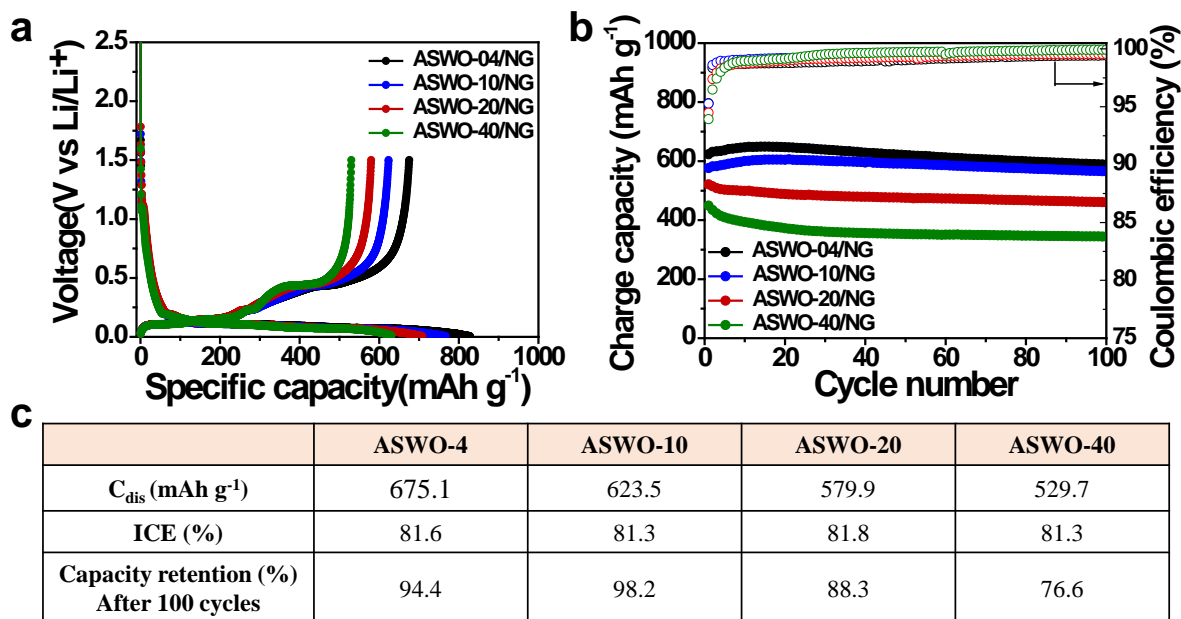

**Figure S13. Electrochemical properties of ASWO/NG anode in half cell.** (a) Initial charge-discharge profiles at a rate of 0.05 C, (b) cyclic performance for 100 cycles at a rate of 0.2 C and (c) summarized electrochemical properties of ASWO/NG electrodes.

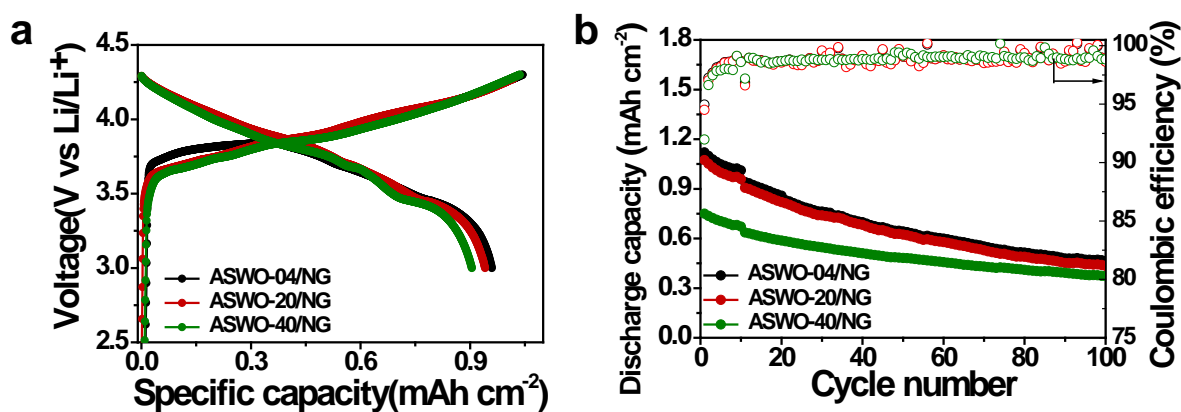

**Figure S14. Electrochemical properties of ASWO/NG-LCO full cell.** (a) Initial charge-discharge profiles at a rate of 0.1 C and (b) cyclic performance for 200 cycles at a rate of 0.5 C of NG/ASWO 04/20/40 electrodes.

**Table S1.** Summary for electrochemical test conditions.

|            | Slurry loading<br>mg cm <sup>-2</sup> | Electrode composition<br>*AM : C : B | Active materials<br>(Si %)                        | Active materials loading<br>mg cm <sup>-2</sup> | Gravimetric capacity |                     | Areal capacity<br>mAh cm <sup>-2</sup> | Current density    |                     |
|------------|---------------------------------------|--------------------------------------|---------------------------------------------------|-------------------------------------------------|----------------------|---------------------|----------------------------------------|--------------------|---------------------|
|            |                                       |                                      |                                                   |                                                 | Slurry               | Active              |                                        | 1C                 | 1C                  |
|            |                                       |                                      |                                                   |                                                 | mAh g <sup>-1</sup>  | mAh g <sup>-1</sup> |                                        | mA g <sup>-1</sup> | mA cm <sup>-2</sup> |
| Al-Si-04   | 1.94                                  | 70 : 10 : 20                         | Al, Si<br>(61.7)                                  | 1.36                                            | 1595.7               | 2279.6              | 3.10                                   | 2279.6             | 3.10                |
| Al-Si-10   | 1.67                                  | 70 : 10 : 20                         | Al, Si<br>(57.6)                                  | 1.17                                            | 1515.9               | 2165.6              | 2.53                                   | 2165.6             | 2.53                |
| Al-Si-20   | 1.76                                  | 70 : 10 : 20                         | Al, Si<br>(50.0)                                  | 1.23                                            | 1353.5               | 1933.6              | 2.38                                   | 1933.6             | 2.38                |
| Al-Si-40   | 1.67                                  | 70 : 10 : 20                         | Al, Si<br>(36.6)                                  | 1.17                                            | 575.8                | 822.6               | 0.96                                   | 822.6              | 0.96                |
| ASWO-04    | 1.49                                  | 70 : 10 : 20                         | Al <sub>2</sub> O <sub>3</sub> , Si<br>(59.2)     | 1.04                                            | 994.0                | 1420.0              | 1.48                                   | 1420.0             | 1.48                |
| ASWO-10    | 1.67                                  | 70 : 10 : 20                         | Al <sub>2</sub> O <sub>3</sub> , Si<br>(54.4)     | 1.17                                            | 895.0                | 1278.6              | 1.50                                   | 1278.6             | 1.50                |
| ASWO-20    | 2.03                                  | 70 : 10 : 20                         | Al <sub>2</sub> O <sub>3</sub> , Si<br>(48.3)     | 1.42                                            | 820.3                | 1171.8              | 1.75                                   | 1171.8             | 1.75                |
| ASWO-40    | 2.13                                  | 70 : 10 : 20                         | Al <sub>2</sub> O <sub>3</sub> , Si<br>(34.3)     | 1.49                                            | 506.8                | 724.0               | 1.17                                   | 724.0              | 1.17                |
| LCO        | 5.56                                  | 85 : 7.5 : 7.5                       | LCO<br>(-)                                        | 3.89                                            | 119.9                | 171.3               | 0.67                                   | 171.3              | 0.67                |
| ASWO-10/NG | 2.13                                  | 90 : 2 : 8<br>(ASWO : NG = 15 : 75)  | Al <sub>2</sub> O <sub>3</sub> , Si, NG<br>(12.3) | 1.49                                            | 436.5                | 623.5               | 0.93                                   | 623.5              | 0.93                |

\* AM = Active Materials  
C = Conducting carbon  
B = Binder

**Table S2.** Summary for battery performance of various Si-based multicomponent system.

| Si anode                                                      | Potential window (V vs. Li/Li <sup>+</sup> ) | Anode half cell                                         |                                                        |             |                                     |            |                                                   |             | Full cell   |                     |                                               |     | Ref. |               |
|---------------------------------------------------------------|----------------------------------------------|---------------------------------------------------------|--------------------------------------------------------|-------------|-------------------------------------|------------|---------------------------------------------------|-------------|-------------|---------------------|-----------------------------------------------|-----|------|---------------|
|                                                               |                                              | First cycle                                             |                                                        |             | Capacity after X cycles at Y C-rate |            |                                                   |             | Cathode     | First cycle ICE (%) | Capacity retention after x cycles at Y C-rate |     |      | retention (%) |
|                                                               |                                              | 1 <sup>st</sup> C <sub>dis</sub> (mAh g <sup>-1</sup> ) | 1 <sup>st</sup> C <sub>ch</sub> (mAh g <sup>-1</sup> ) | ICE (%)     | X                                   | Y          | Capacity / retention (mAh g <sup>-1</sup> ) / (%) | X           |             |                     | Y                                             |     |      |               |
| Si/Al <sub>2</sub> O <sub>3</sub>                             | 0.01-1                                       | ~2550                                                   | 2055                                                   | ~80         | 100                                 | 0.2        | ~1500                                             | 82          | -           | -                   | -                                             | -   | -    | 26            |
| Al <sub>2</sub> O <sub>3</sub> coated NiSi <sub>2</sub> -SiNW | 0.01-2                                       | ~3900                                                   | ~3400                                                  | ~87         | 100                                 | 0.2        | ~2600                                             | ~75         | -           | -                   | -                                             | -   | -    | 27            |
| Si-Al <sub>2</sub> O <sub>3</sub>                             | 0.23-2                                       | -                                                       | 1125                                                   | -           | 100                                 | -          | ~1100                                             | ~98         | -           | -                   | -                                             | -   | -    | 28            |
| Si-NiSi <sub>2</sub> -Al <sub>2</sub> O <sub>3</sub> @C       | 0.01-2                                       | ~1000                                                   | ~800                                                   | ~80         | 50                                  | 0.1        | ~700                                              | ~89         | -           | -                   | -                                             | -   | -    | 29            |
| Si/hard carbon                                                | 0.005-1.5                                    | 654                                                     | 513                                                    | 78.4        | 100                                 | 0.2        | 300                                               | ~100        | LMO         | 86.2                | 50                                            | 0.2 | 87   | 1*            |
| Si/graphene                                                   | 0.05-1                                       | 2782                                                    | 2227                                                   | 80.1        | 50                                  | 0.5        | 984                                               | 60.1        | NCA         | 78.7                | 50                                            | 0.5 | 82.9 | 2*            |
| Si@TiO <sub>2</sub> /C                                        | 0.005-2.5                                    | 1710                                                    | 1260                                                   | 74          | 50                                  | 0.2        | 950                                               | 90          | LCO         | 69                  | -                                             | -   | -    | 3*            |
| Si/graphene                                                   | 0.01-1                                       | 1365                                                    | 891                                                    | 65.3        | 500                                 | 0.4        | 553                                               | ~65         | LNMO        | 78.3                | 100                                           | 0.2 | ~55  | 4*            |
| Si/CNT                                                        | 0.005-3                                      | -                                                       | ~2240                                                  | -           | 100                                 | 0.4        | ~2000                                             | 88          | CNT/<br>LMO | ~88                 | 100                                           | 1   | 87   | 5*            |
| <b>Our work (ASWO-10)</b>                                     | <b>0.005-15</b>                              | <b>1622.6</b>                                           | <b>1278.6</b>                                          | <b>78.8</b> | <b>500</b>                          | <b>0.2</b> | <b>~810</b>                                       | <b>81.9</b> | <b>LCO</b>  | <b>91</b>           |                                               |     |      | <b>-</b>      |

\*=supplementary references

## References

- 1 G. Hwang, J. M. Kim, D. Hong, C. K. Kim, N. S. Choi, S. Y. Lee and S. Park, *Green Chem.*, 2016, **18**, 2710.
- 2 K. Eom, T. Joshi, A. Bordes, I. Do and T. F. Fuller, *J. Power Sources*, 2014, **249**, 118.
- 3 G. Jeong, J. G. Kim, M. S. Park, M. Seo, S. M. Hwang, Y. U. Kim, Y. J. Kim, J. H. Kim and S. X. Dou, *ACS Nano*, 2014, **8**, 2977.
- 4 J. G. Ren, Q. H. Wu, G. Hong, W. J. Zhang, H. M. Wu, K. Amine, J. B. Yang and S. T. Lee, *Energy. Technol.*, 2013, **1**, 77.
- 5 W. Weng, Q. Sun, Y. Zhang, H. J. Lin, J. Ren, X. Lu, M. Wang and H. S. Peng, *Nano Lett.*, 2014, **14**, 3432.
